# Supplementary material for: Preclinical and Clinical Observations Implying Combination Therapy to Enhance the Efficacy of the Her-2/Neu B Cell Peptide-Based Vaccine Her-Vaxx and to Prevent Immune Evasion
Source: Preprints.org preprint supplement (doi:10.20944/preprints202311.1400.v1), 2023-11-22
Supplement: Supplementary file 1 [file supplementary]

*Supplementary Materials*

Supplementary Table

**Table S1-** Details regarding primary antibodies, dilution, antigen retrieval, secondary antibodies, chromogen, and counterstain, used for the pathohistological assessments.

| **Antibody** | **Dilution** | **Antigen retrieval** | **Detection System** | **Immunostaining reagent** | **Counterstain** |
| --- | --- | --- | --- | --- | --- |
| **PDL1**  **CST#64988** | 1: 200 | Heating in  citrate buffer  pH 6 | secondary antibody conjugated to enzyme labelled polymer  (Bright Vision Rabbit HRP KL DPVR 110 HRP) | DAB (DAB Quanto # TA-125-QHDX) | hematoxylin |
| **Her2**  **CST#2242** | 1: 100 | Heating in  Tris-EDTA buffer  pH 9 | secondary antibody conjugated to enzyme labelled polymer  (Bright Vision Rabbit HRP KL DPVR 110 HRP) | DAB (DAB Quanto # TA-125-QHDX) | hematoxylin |
| **F4/80**  **CST#70076** | 1: 1000 | Heating in  citrate buffer  pH 6 | Strept-Avidin biotin complex method with horse radish peroxidase  (Abcam ab64269) | DB (DAB Quanto # TA-125-QHDX) | hematoxylin |
| **CD79b**  **CST#96024** | 1: 250 | Heating in  Tris-EDTA buffer  pH 9 | secondary antibody conjugated to enzyme labelled polymer  (Bright Vision Rabbit HRP KL DPVR 110 HRP) | DAB (DAB Quanto # TA-125-QHDX) | hematoxylin |
